# Supplementary material
Source: PubMed Central journal article supplement (PMC2631972)
Supplement: M808048200_1.pdf [file M808048200_1.pdf]

## SUPPLEMENTAL DATA

Supplementary Fig. 1. Schematic diagram of various forms of Sox9. Nuclear localization signals (NLS) and nuclear export signal (NES) in the Sox9 HMG domain are shown. Sox9 $\Delta$ C contains amino acids 1-383; Sox9 $\Delta$ N contains amino acids 104-509; Sox9-NLS\* carries the substitutions RRR/GGT at amino acids 120-121 and deletion of PRRRK at amino acids 176-180; Sox9-NLS\*NLS (TA) carries a NLS from SV40 large T antigen (TA) at its C-terminus; Sox9 $\Delta$ HMG contains a deletion of HMG domain from 103 to 182 amino acids; Sox9 $\Delta$ HMG-NLS (TA) contains a deletion of HMG domain, but also carries a NLS from SV40 large T antigen.

Supplementary Fig. 2. Sox9 was unable to promote degradation of stabilized phosphorylation-resistant  $\beta$ -catenin in SW48 cells (Lanes 1 and 2) or wild type  $\beta$ -catenin in SW480 cells that lack functional APC (Lanes 3 and 4) or in SNU475 cells that lack of Axin (Lanes 5 and 6). SW48, SW480 and SNU475 cells were transiently transfected with Sox9 and 24 hours later, cells were analyzed by Western blot with anti- $\beta$ -catenin and anti-Sox9 antibodies. The status of the  $\beta$ -catenin phosphorylation was analyzed with phospho- $\beta$ -catenin-specific (S45 and S33/37) antibodies.

Supplementary Fig. 3. Sox9 promoted nuclear localization of Axin, GSK3 $\beta$ ,  $\beta$ TrCP, and CK1 $\alpha$ . CHO cells were transiently transfected with indicated plasmids or infected with Sox9-adenovirus, and protein sub-cellular localization was analyzed by immunofluorescent cytochemistry. DAPI stained the nucleus. A. Axin (green) was stained with anti-myc, and Sox9 (red) was stained with anti-Flag antibodies. B. CHO cells were infected with Sox9-adenovirus and localization of endogenous GSK3 $\beta$  was analyzed with anti-GSK3 $\beta$  antibody (green). Sox9 was detected with anti-Sox9 antibody (red). C.  $\beta$ TrCP (green) was detected with anti-myc antibody and Sox9 (red) was detected with anti-Flag antibody. D. CK1 $\alpha$  (green) was stained with anti-HA antibody. In Sox9 (red) expressing cells, more CK1 $\alpha$  was found in the nucleus (arrows).

Supplementary Fig. 4. Removal of Sox9 from primary chondrocytes led to a decreased amount of nuclear Axin,  $\beta$ -catenin,  $\beta$ TrCP and GSK3 $\beta$ . Primary chondrocytes were isolated from Sox9<sup>Cre</sup> mice and infected with Cre-adenovirus. Cells were fractionated and analysed by Western blot for the endogenous Axin,  $\beta$ -catenin,  $\beta$ TrCP and GSK3 $\beta$ . Lamins A+C and Tubulin were used as markers for nuclear and cytoplasmic fractions, respectively.

Supplementary Fig. 5. Sox9 bound to  $\beta$ TrCP and promoted its nuclear localization. A. Sox9 coIPed with  $\beta$ TrCP in CHO cells. Cells were transiently transfected with the indicated plasmids and  $\beta$ TrCP was immunoprecipitated by anti-myc antibody. Sox9 was detected by anti-Flag antibody. B. Deletion of C-terminus of Sox9 abolished its binding to  $\beta$ TrCP. Cos cells were transfected with the indicated plasmids and Sox9 was immunoprecipitated with anti-Flag antibody.  $\beta$ TrCP was detected with anti-myc antibody. C. Deletion of F-box in  $\beta$ TrCP did not abolish its ability to coIP with Sox9. CHO cells were transfected with the indicated plasmids and Sox9 was detected in the immuno-complexes with  $\Delta\beta$ TrCP with anti-Flag antibody. D. Sox9 formed a complex with  $\beta$ TrCP independently of  $\beta$ -catenin. Sox9 was coIPed with  $\beta$ TrCP in NCI-H28 cells using anti-myc antibody. E. Sox9 formed a complex with GSK3 $\beta$  independently of  $\beta$ -catenin. Sox9 was coIPed with GSK3 $\beta$  in NCI-H28 using anti-HA antibody.

Supplementary Fig. 6. Both cytoplasmic and nuclear forms of Sox9 bound to  $\beta$ -catenin, GSK3 $\beta$  and  $\beta$ TrCP. A. Nuclear Sox9 mutant (Sox9 $\Delta$ HMG-NLS(TA)) binds  $\beta$ -catenin more efficiently. Cos cells were transfected with the indicated plasmids. (a)  $\beta$ -catenin was co-IPed with Sox9 and its mutant forms by anti-myc antibody. (b) Amount of IPed  $\beta$ -catenin-myc loaded on gel was normalized by anti-myc antibody. The membrane was stripped and re-probed with anti-Flag

antibody. B. Both cytoplasmic and nuclear forms of Sox9 bind GSK3 $\beta$ . Cos cells were transfected with GSK3-HA and Flag-tagged Sox9 and its mutants. (a) GSK3 $\beta$  was co-IPed with Sox9 and its mutant using anti-HA antibody. (b) Amount of IPed GSK3 $\beta$ -HA loaded on gel was normalized with anti-HA antibody. The membrane was stripped and re-probed with anti-Flag antibody. C. Both cytoplasmic and nuclear forms of Sox9 bind  $\beta$ TrCP. Cos cells were transfected with  $\beta$ TrCP-myc and Flag-tagged Sox9 and its mutants. (a)  $\beta$ TrCP was co-IPed with Sox9 and its mutants using anti-myc antibody. (b) Amount of IPed  $\beta$ TrCP loaded on gel was normalized with anti-myc antibody. The membrane was stripped and re-probed with anti-Flag antibody.

# Supplementary Figure 1

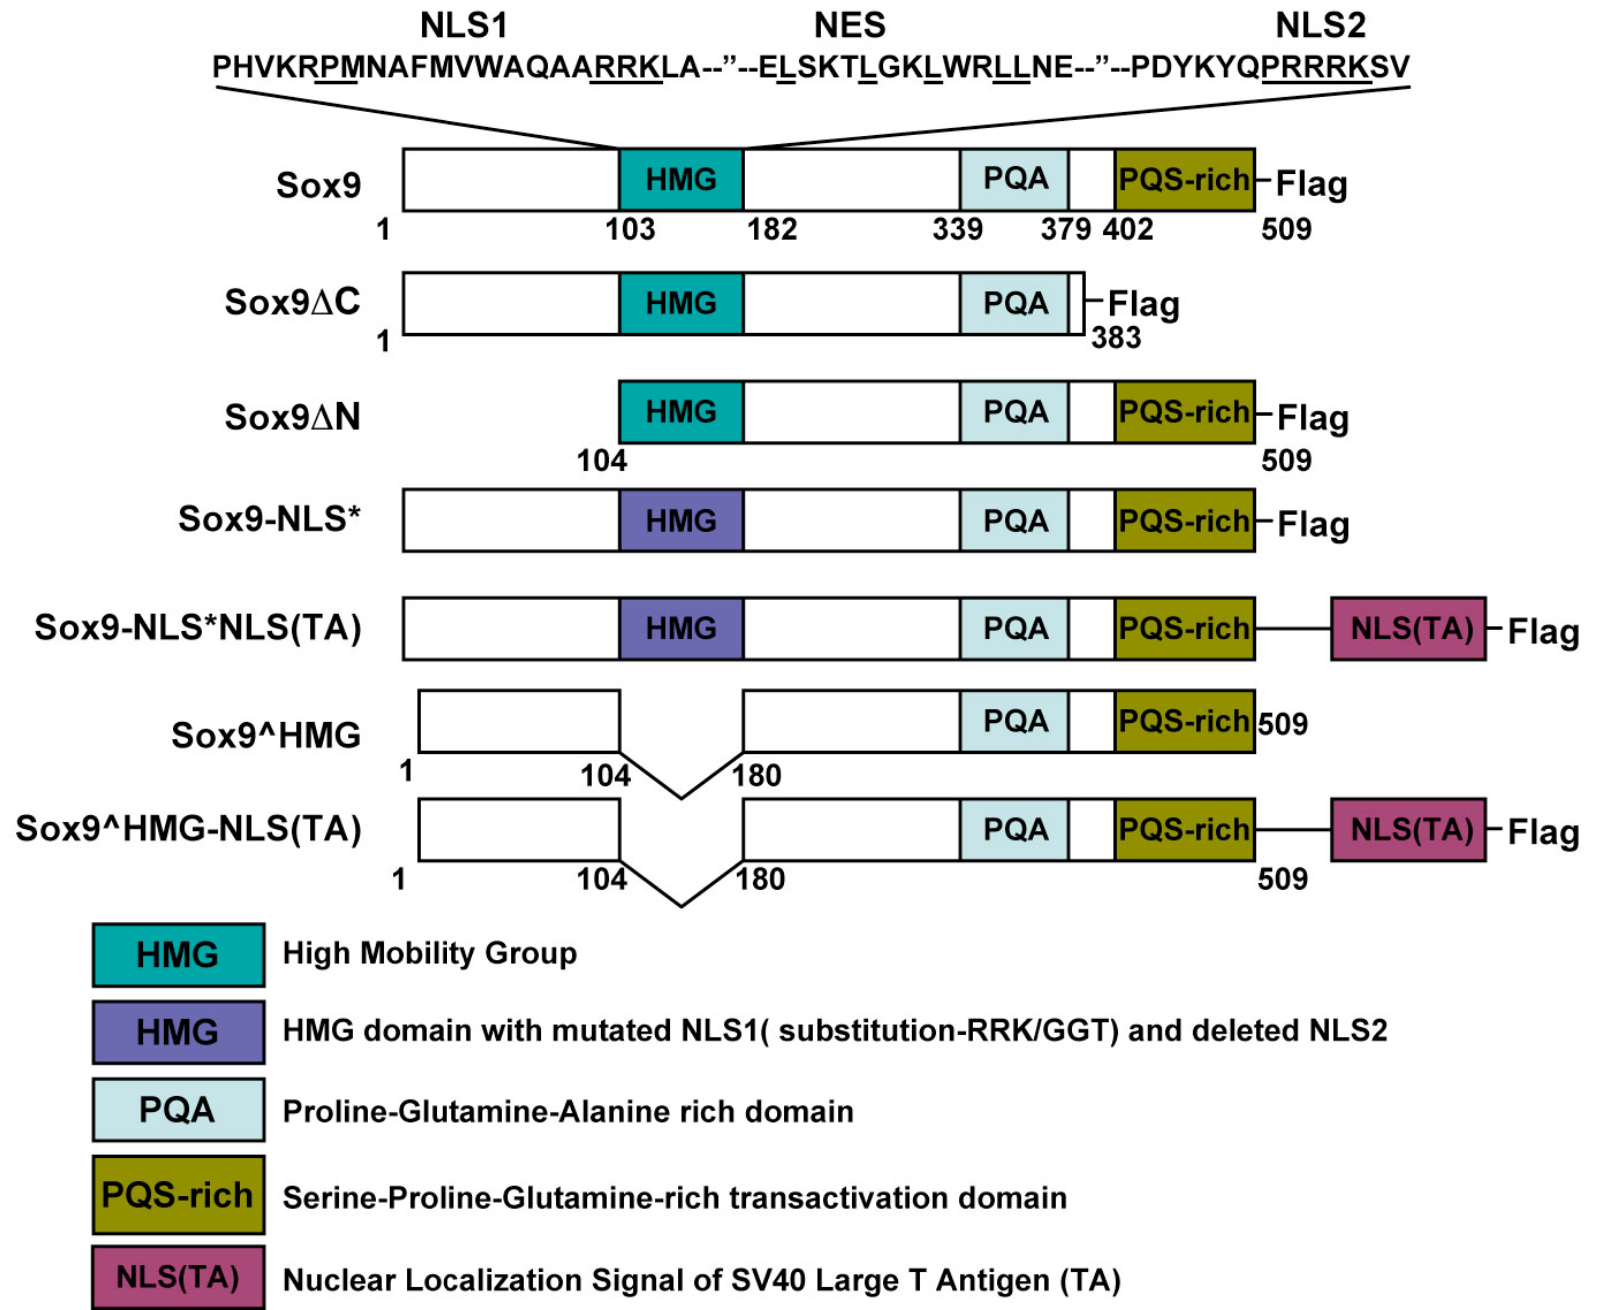

Topol\_Supplementary Figure 2

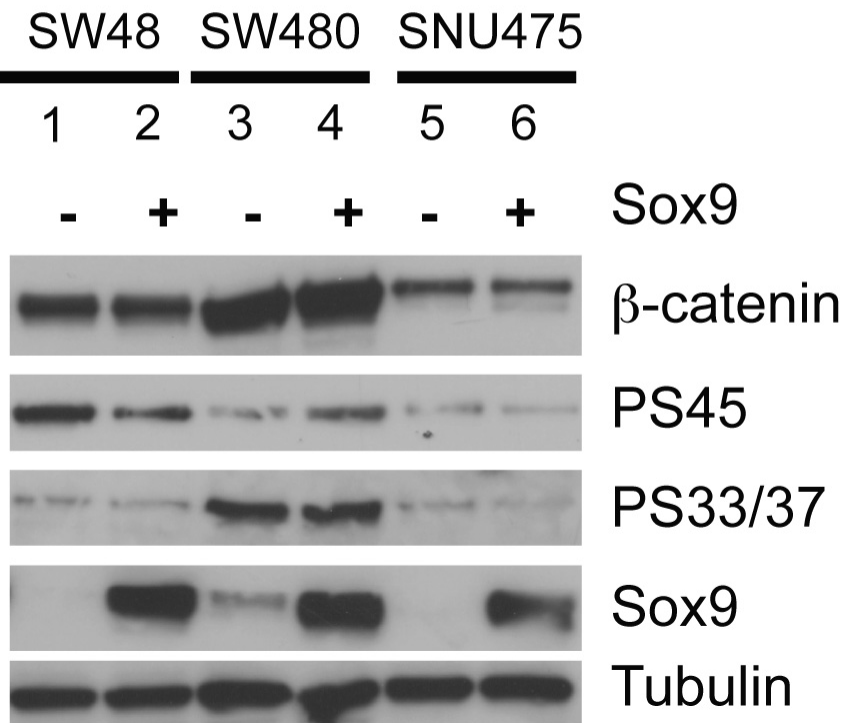

# Supplementary Figure 3

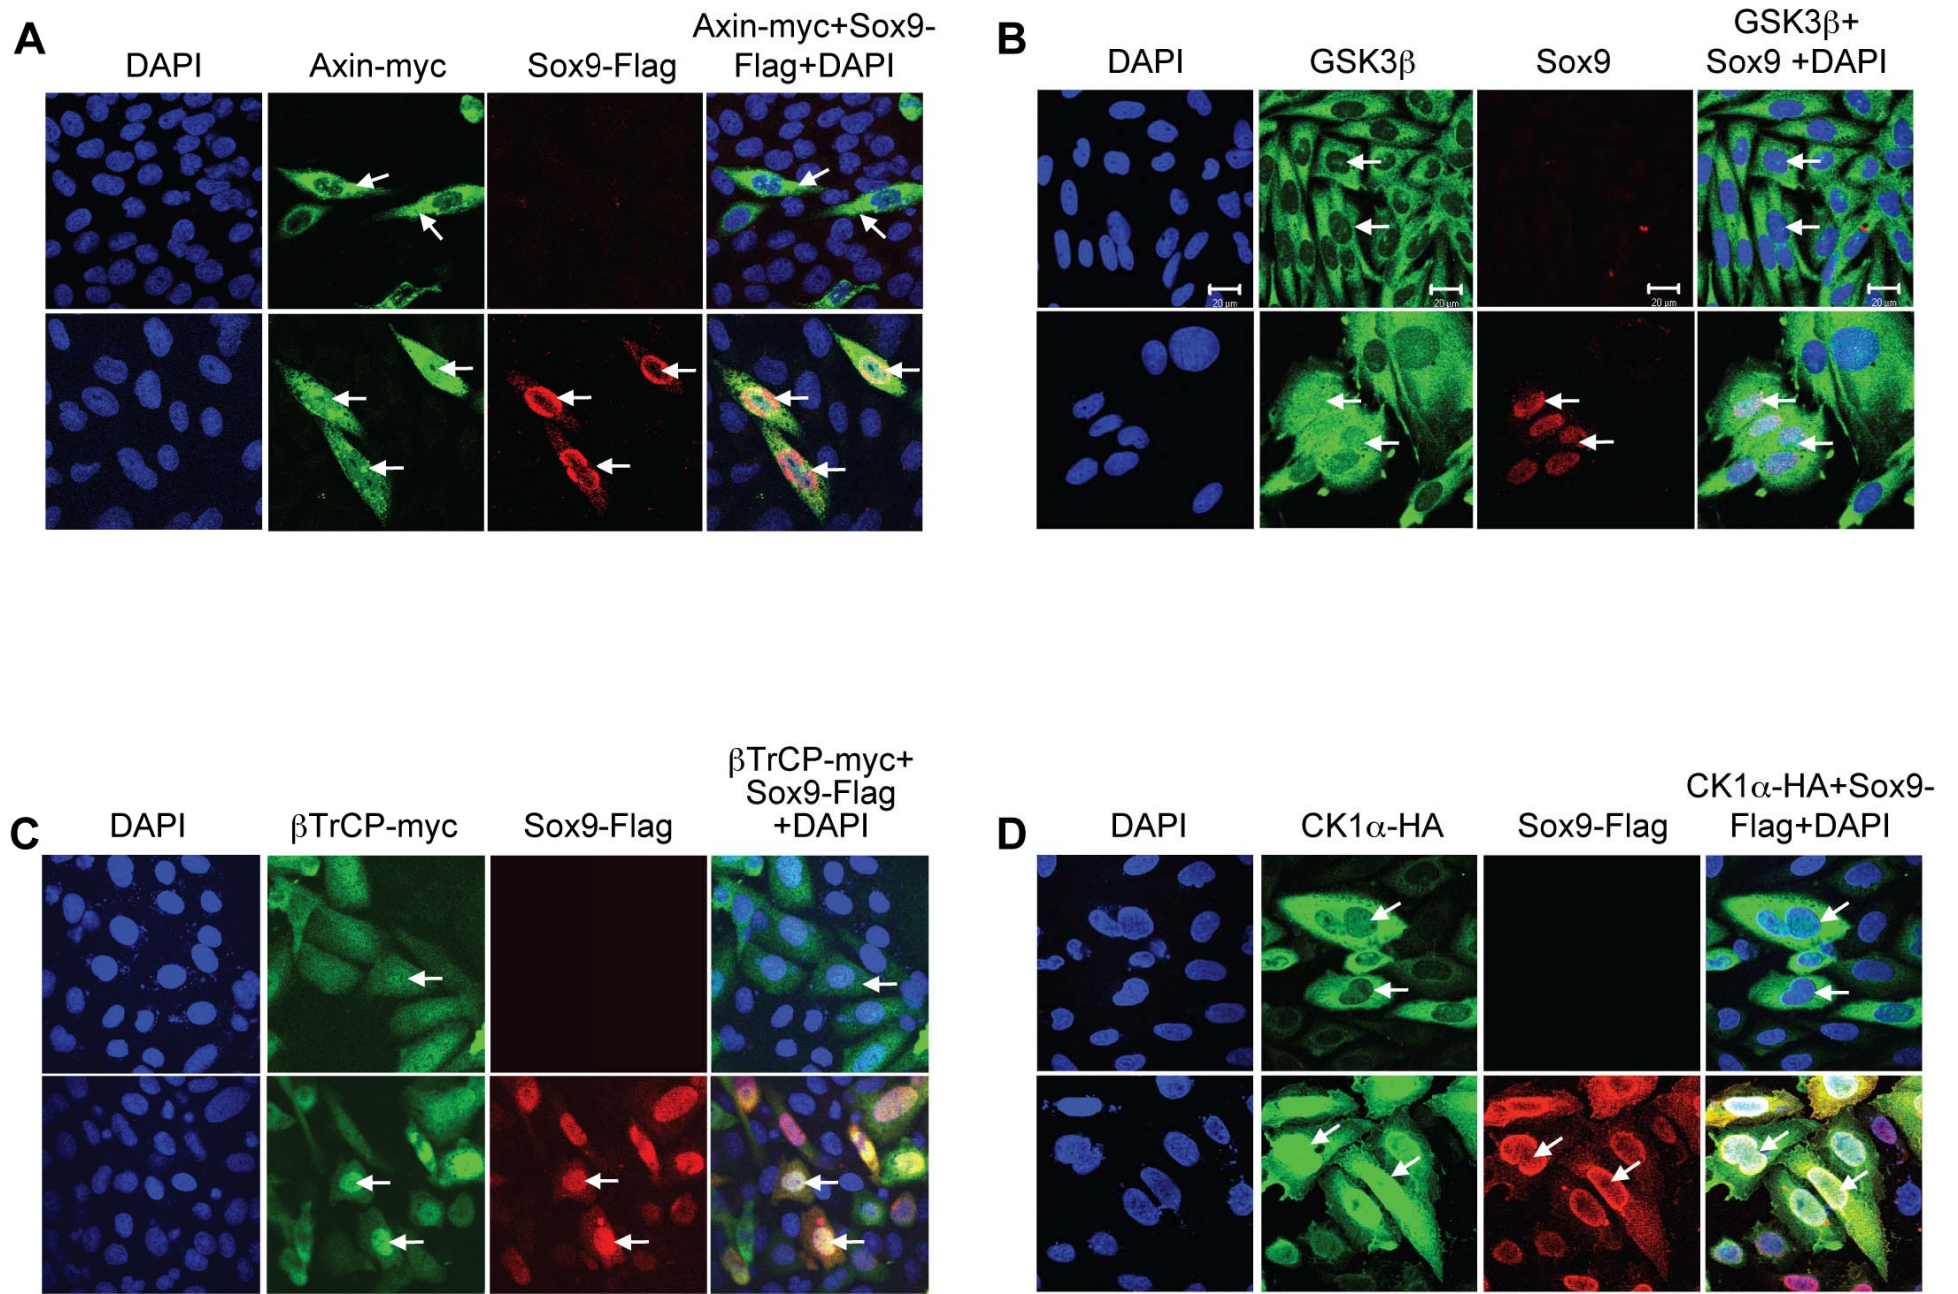

# Topol\_Supplementary Figure 4

## Cytoplasmic fraction

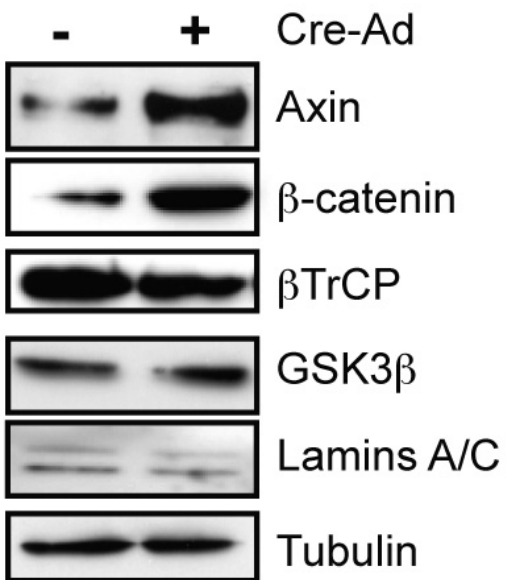

## Nuclear fraction

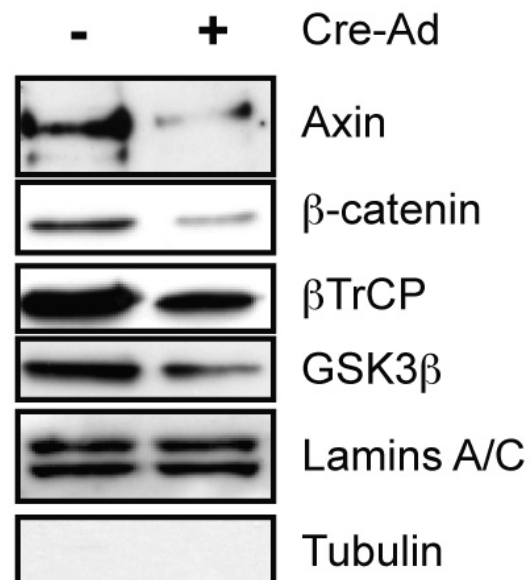

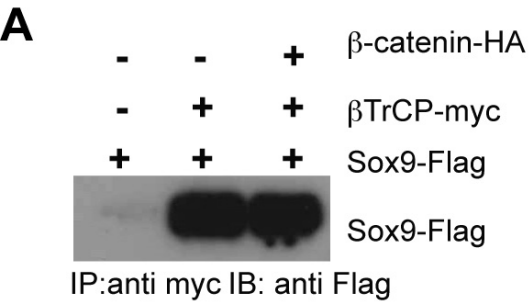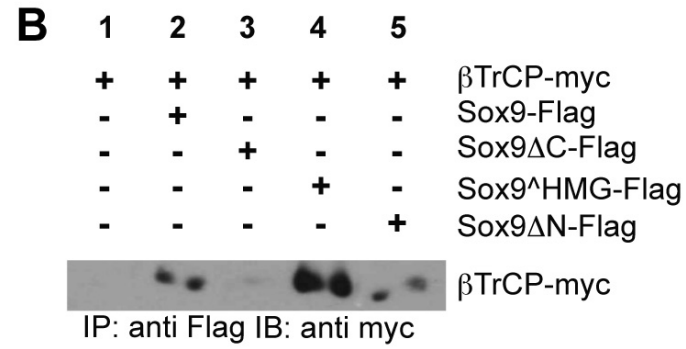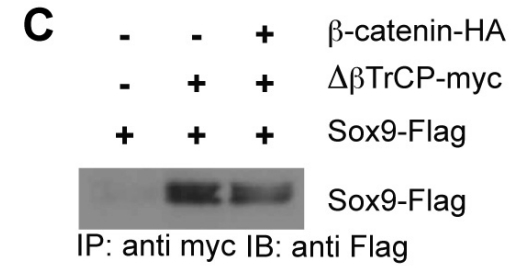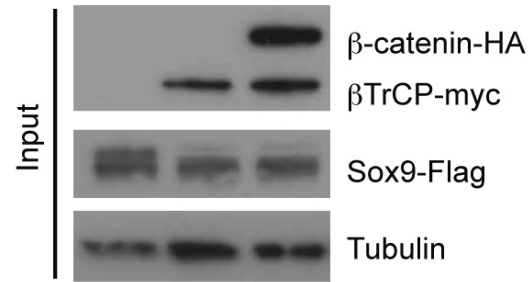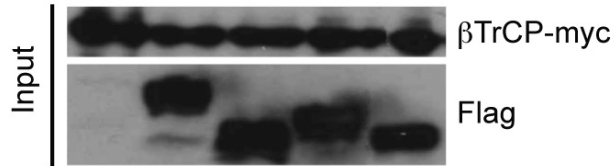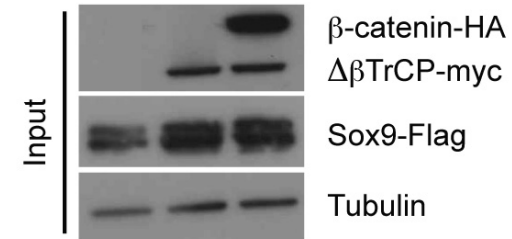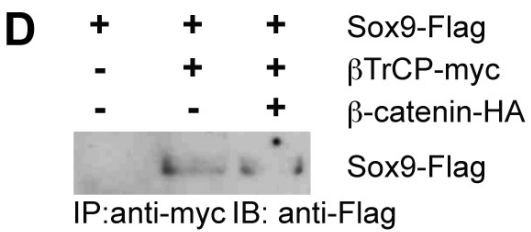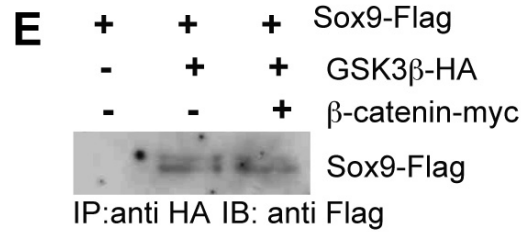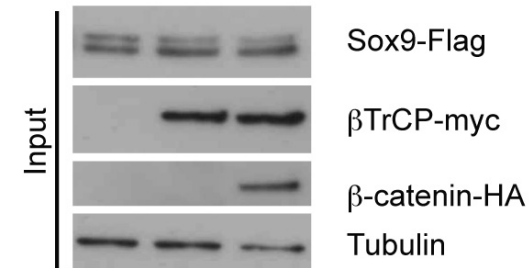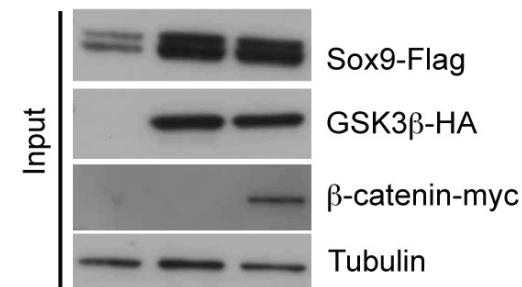



**A**

**a**

|                                    |   |   |   |   |
|------------------------------------|---|---|---|---|
| β-catenin-myc                      | + | + | + | + |
| Sox9-Flag                          | - | + | - | - |
| Sox9 <sup>Δ</sup> HMG-Flag         | - | - | + | - |
| Sox9 <sup>Δ</sup> HMG-NLS(TA)-Flag | - | - | - | + |

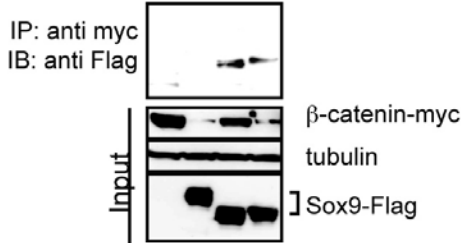

**b**

|                                    |   |   |   |
|------------------------------------|---|---|---|
| β-catenin-myc                      | + | + | + |
| Sox9-Flag                          | + | - | - |
| Sox9 <sup>Δ</sup> HMG-Flag         | - | + | - |
| Sox9 <sup>Δ</sup> HMG-NLS(TA)-Flag | - | - | + |

IP: anti myc/IB:anti myc

IP: anti myc/IB :anti Flag

β-catenin-myc  
Sox9-Flag

**B**

**a**

|                                    |   |   |   |   |   |   |
|------------------------------------|---|---|---|---|---|---|
| GSK3β-HA                           | - | + | - | + | - | + |
| Sox9-Flag                          | + | + | - | - | - | - |
| Sox9 <sup>Δ</sup> HMG-Flag         | - | - | + | + | - | - |
| Sox9 <sup>Δ</sup> HMG-NLS(TA)-Flag | - | - | - | - | + | + |

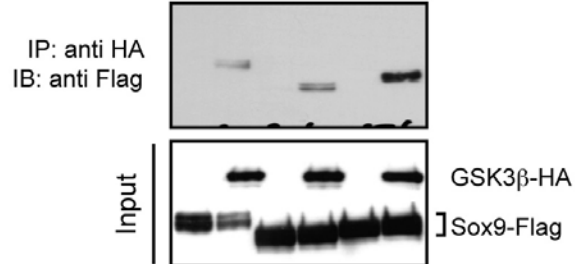

**b**

|                                    |   |   |   |
|------------------------------------|---|---|---|
| GSK3β-HA                           | + | + | + |
| Sox9-Flag                          | + | - | - |
| Sox9 <sup>Δ</sup> HMG-Flag         | - | + | - |
| Sox9 <sup>Δ</sup> HMG-NLS(TA)-Flag | - | - | + |

IP: anti HA  
IB: anti HA

IP: anti HA  
IB: anti Flag

IgG  
GSK3β-HA  
Sox9-Flag

**C**

**a**

|                                    |   |   |   |   |   |   |
|------------------------------------|---|---|---|---|---|---|
| βTrCP-myc                          | - | + | - | + | - | + |
| Sox9-Flag                          | + | + | - | - | - | - |
| Sox9 <sup>Δ</sup> HMG-Flag         | - | - | + | + | - | - |
| Sox9 <sup>Δ</sup> HMG-NLS(TA)-Flag | - | - | - | - | + | + |

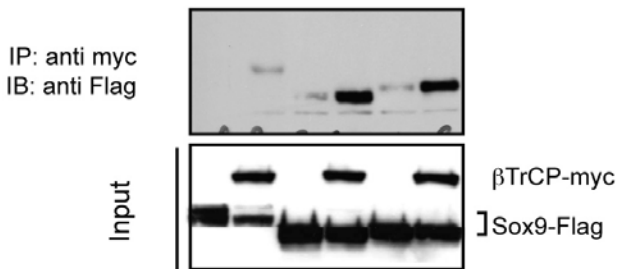

**b**

|                                    |   |   |   |
|------------------------------------|---|---|---|
| βTrCP-myc                          | + | + | + |
| Sox9-Flag                          | + | - | - |
| Sox9 <sup>Δ</sup> HMG-Flag         | - | + | - |
| Sox9 <sup>Δ</sup> HMG-NLS(TA)-Flag | - | - | + |

IP: anti myc  
IB: anti myc

IB: anti Flag

βTrCP-myc  
Sox9-Flag
